# Supplementary material for: KCl-assisted activation: Moringa oleifera branch-derived porous carbon for high performance supercapacitor
Source: Royal Society of Chemistry journal article supplement (doi:10.1039/d1nj00046b), 2021-01-01
Supplement: d1nj00046b1.pdf [file d1nj00046b1.pdf]

## Supplementary Information

### **KCl-assisted activation: Moringa oleifera branch-derived porous carbon for high performance supercapacitor**

Yongxiang Zhang<sup>a,b</sup>, Peifeng Yu<sup>a</sup>, Mingtao Zheng<sup>a,b</sup>, Yong Xiao<sup>a,b</sup>, Hang Hu<sup>a,b</sup>, Yeru Liang<sup>a,b</sup>, Yingliang Liu<sup>a,b\*</sup>, Hanwu Dong<sup>a,b\*</sup>

<sup>a</sup> Key Laboratory for Biobased Materials and Energy of Ministry of Education, College of Materials and Energy, South China Agricultural University, Guangzhou, 510642, Guangdong, China

<sup>b</sup> Guangdong Laboratory of Lingnan Modern Agriculture, Guangzhou, 510642, China

*E-mail address:* hanwu@scau.edu.cn; tliuyl@scau.edu.cn.

### **Supporting Information Contents:**

Number of pages: 16

Number of figures: 11

Number of tables: 10

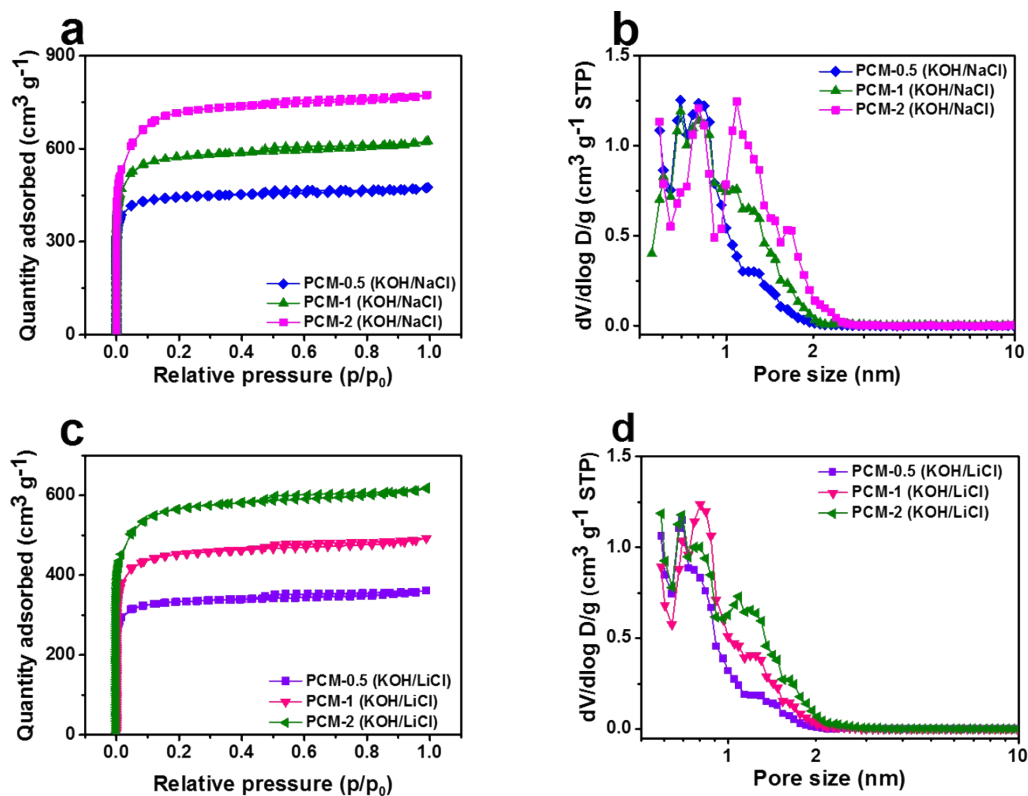

**Figure S1.** (a) N<sub>2</sub> adsorption-desorption isotherms, (b) DFT pore size distribution curves of PCM-0.5 (KOH/NaCl), PCM-1 (KOH/NaCl) and PCM-2 (KOH/NaCl). (c) N<sub>2</sub> adsorption-desorption isotherms, (d) DFT pore size distribution curves of PCM-0.5 (KOH/LiCl), PCM-1 (KOH/LiCl) and PCM-2 (KOH/LiCl).

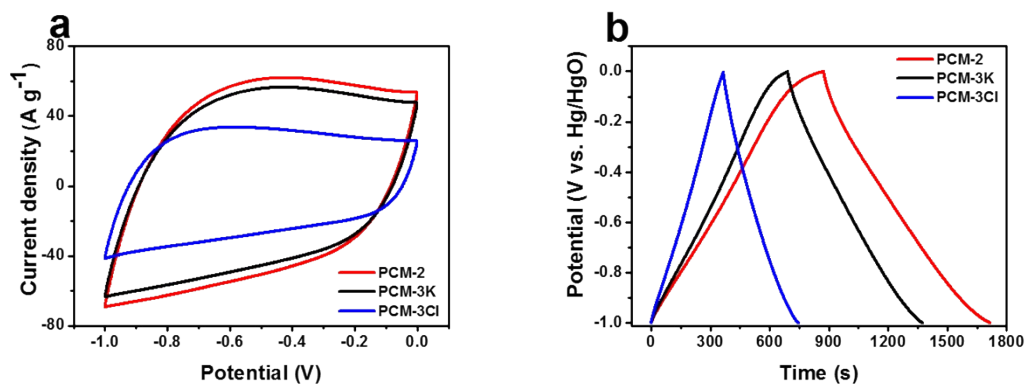

**Figure S2.** Comparison of (a) CV curves at 200 mV s<sup>-1</sup> and (b) GCD curves at 0.5 A g<sup>-1</sup> for PCM-2, PCM-3K and PCM-3Cl in a three-electrode system by using 6.0 M KOH aqueous solution as the electrolyte.

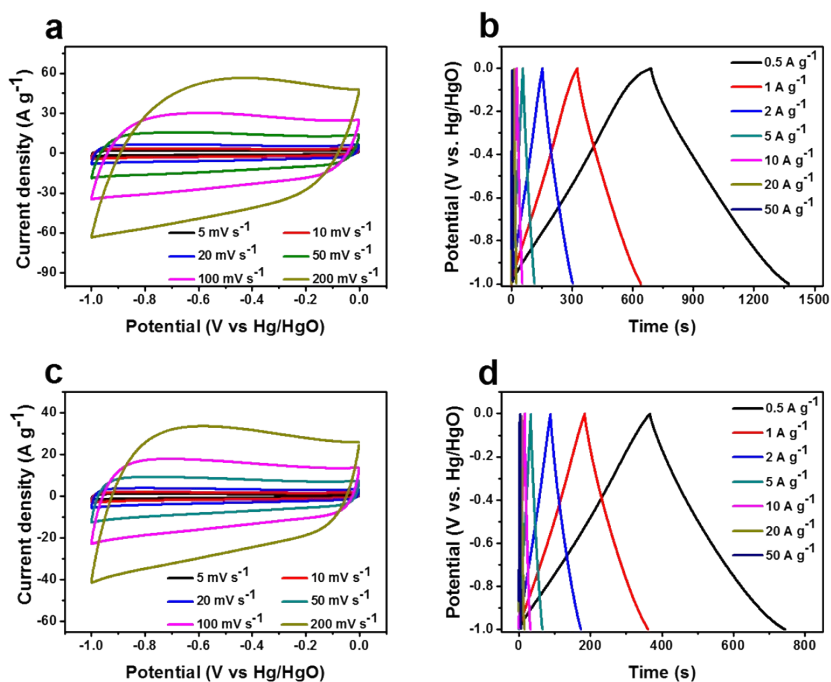

**Figure S3.** CV and GCD curves of (a, b) PCM-3K and (c, d) PCM-3Cl in a three-electrode system by using 6.0 M KOH aqueous solution as the electrolyte.

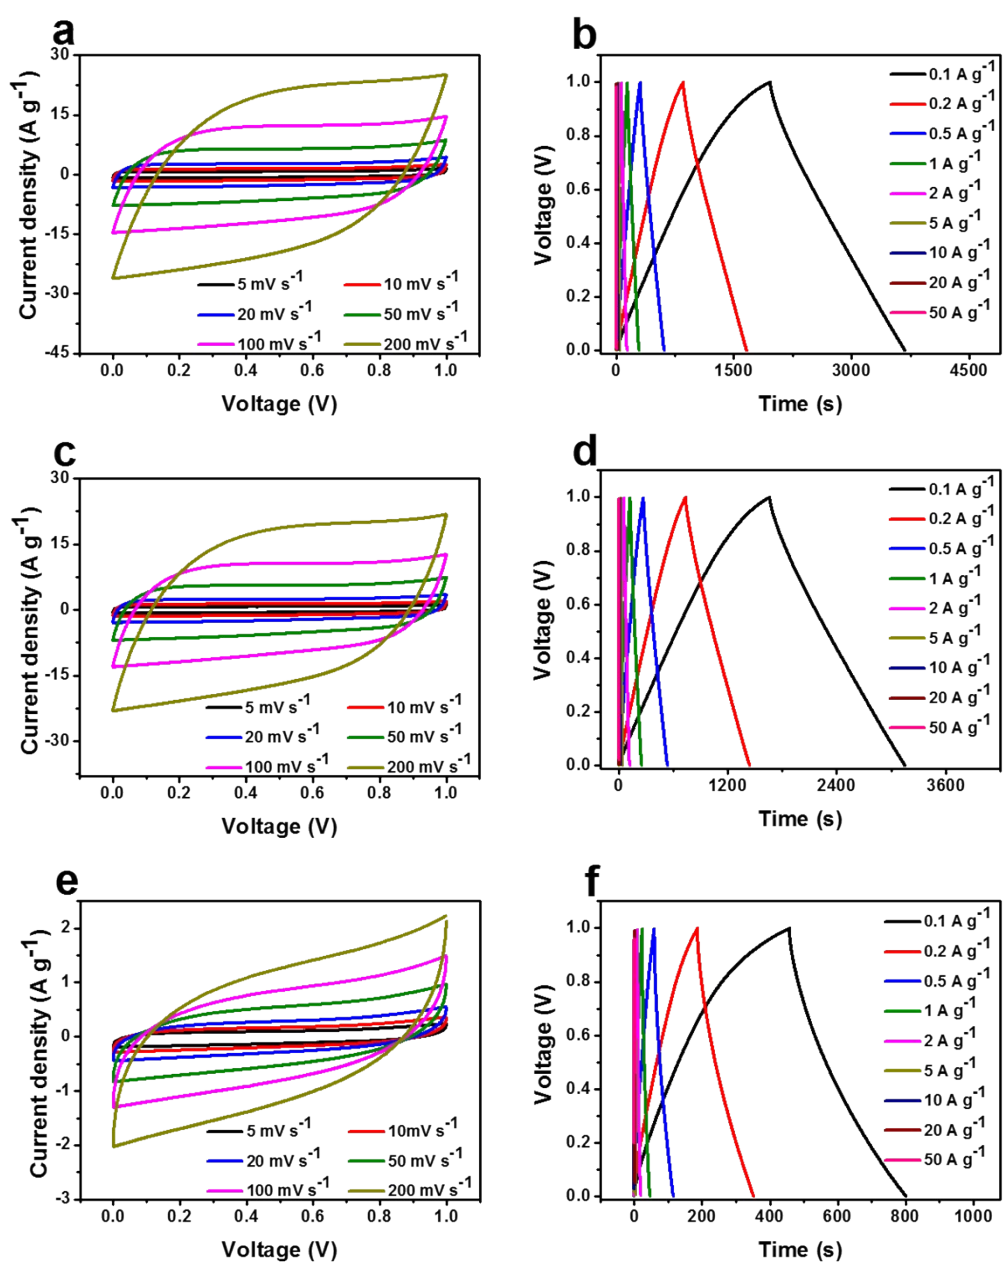

**Figure S4.** CV and GCD curves of (a, b) PCM-2, (c, d) PCM-3K and (e, f) PCM-3Cl coin-type symmetrical supercapacitors by using 6 M KOH aqueous solution as electrolyte.

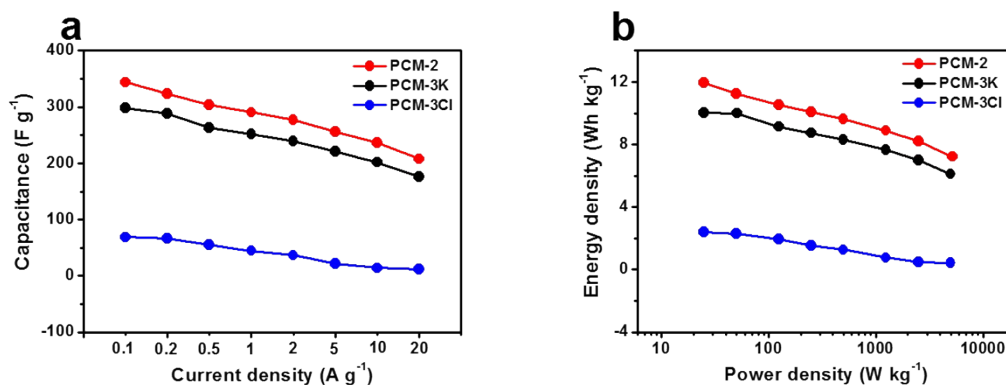

**Figure S5.** (a) Capacitance comparison of PCM-2, PCM-3K and PCM-3Cl at various current densities in a coin-type supercapacitor and (b) Ragone plots of sample in coin-type supercapacitors by using 6.0 M KOH aqueous solution as the electrolyte.

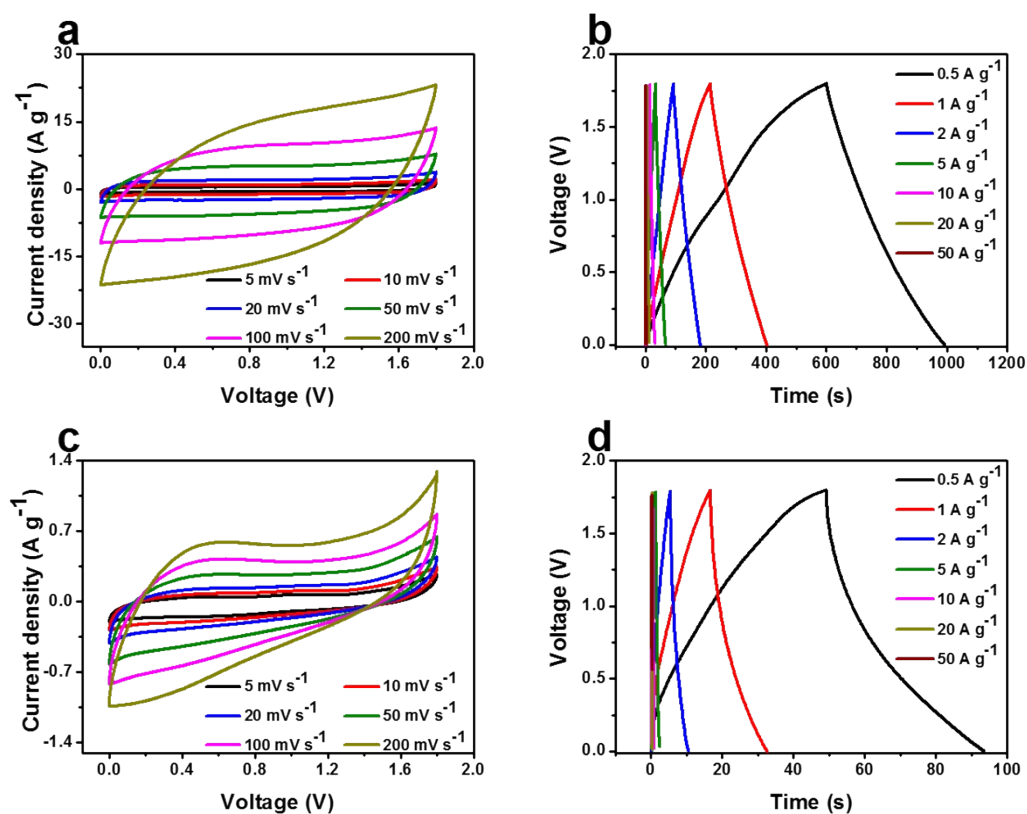

**Figure S6.** CV and GCD curves of (a, b) PCM-3K and (c, d) PCM-3Cl coin-type symmetrical supercapacitors by using 1.0 M Na<sub>2</sub>SO<sub>4</sub> aqueous solution as electrolyte.

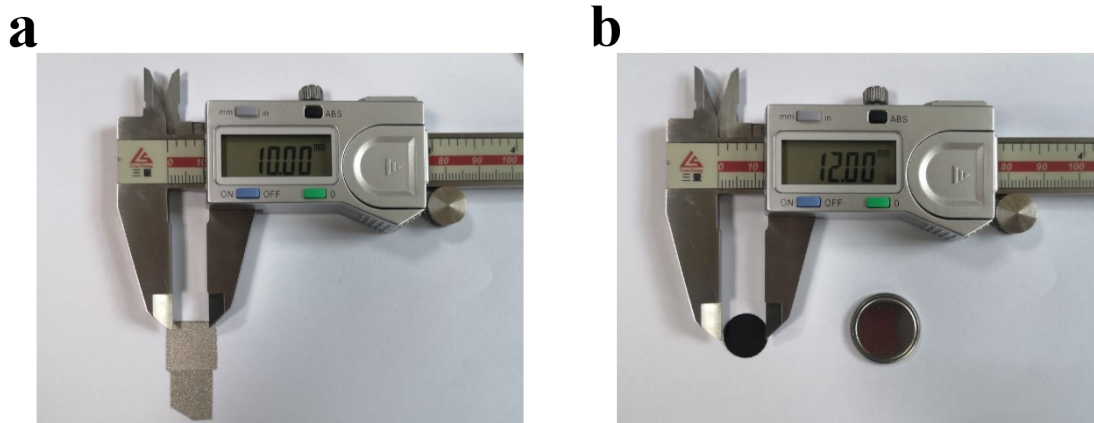

**Figure S7.** (a) The size dimension of PCMs electrode for the three-electrode system ( $1 \times 1 \text{ cm}^2$ ), (b) The size dimension of the PCMs electrode for the two-electrode symmetrical supercapacitors ( $0.36\pi \text{ cm}^2$ ).

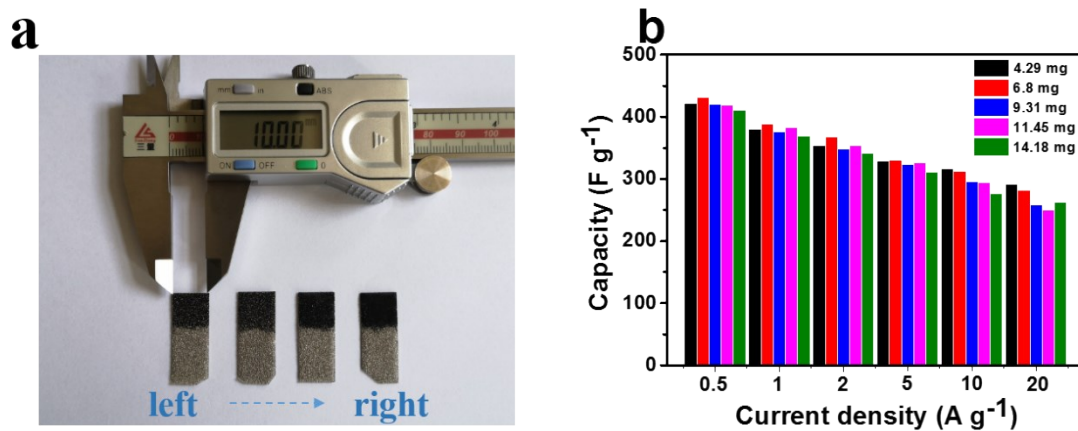

**Figure S8.** (a) The PCM-2-based electrodes loaded with different masses (the loading masses from left to right are 6.8, 9.31, 11.45 and 14.18  $\text{mg cm}^{-2}$  (including active materials, carbon black, PTFE and the mass ratio is 8:1:1), respectively). (b) The gravimetric capacitance of PCM-2-base electrodes loaded with different masses.

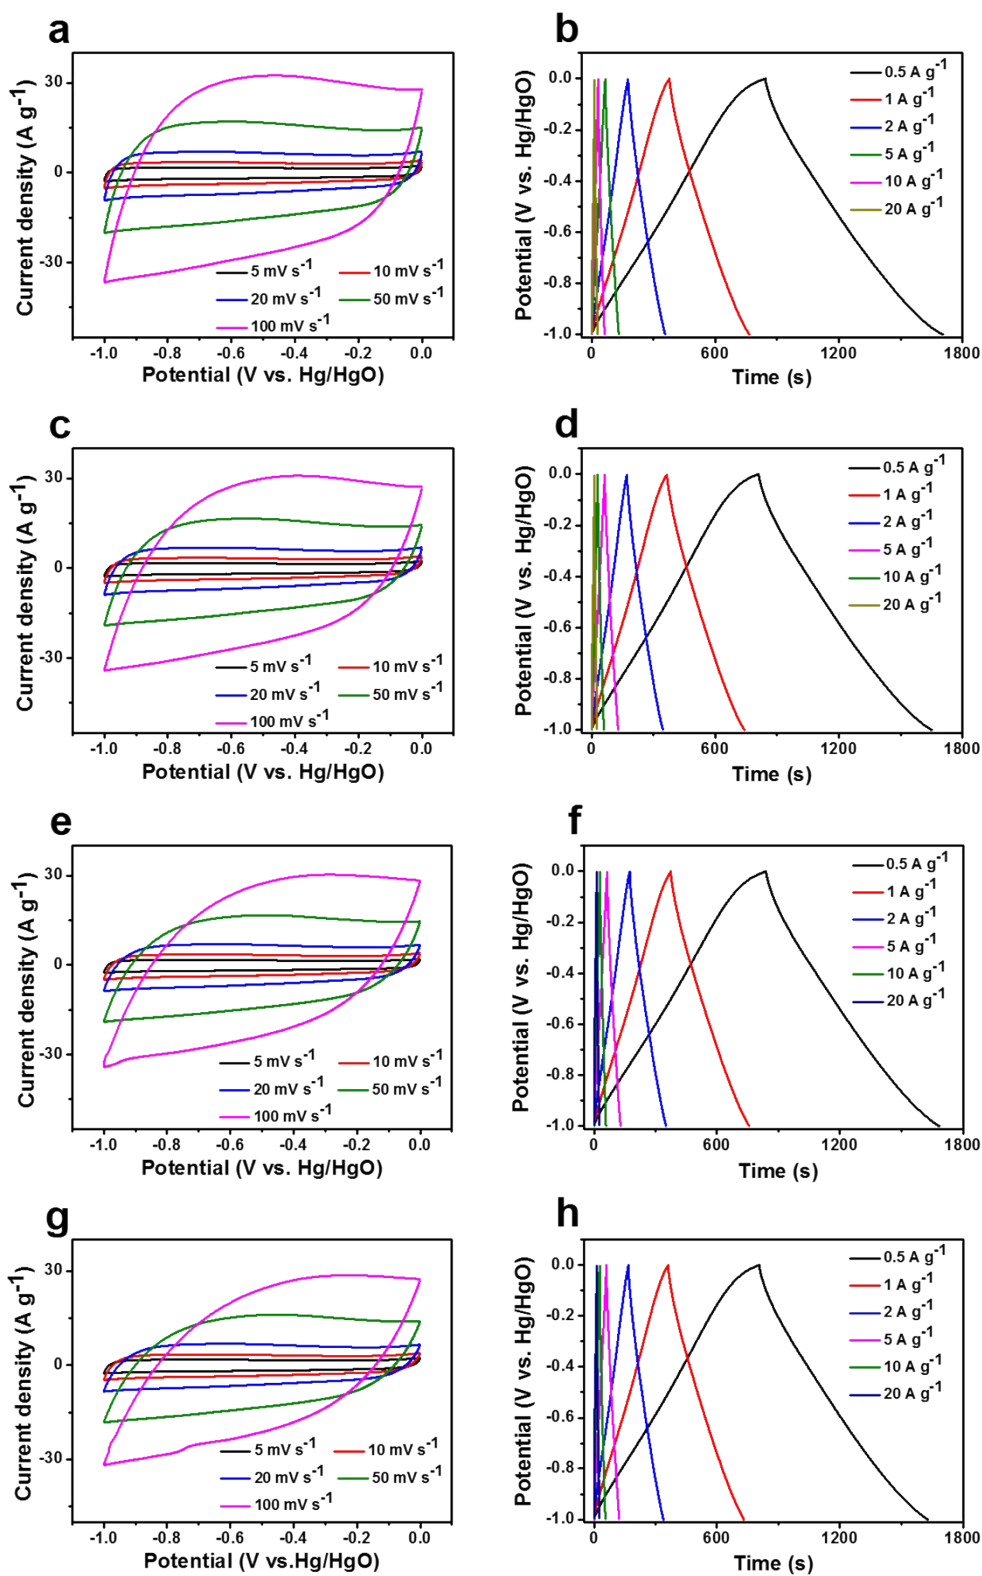

Figure S9. CV and GCD curves of PCM-2 electrodes loaded with different masses in a three-electrode system by using 6.0 M KOH aqueous solution as the electrolyte. (a, b) 6.8, (c, d) 9.31, (e, f) 11.45 and (g, h) 14.18 mg cm<sup>-2</sup>.

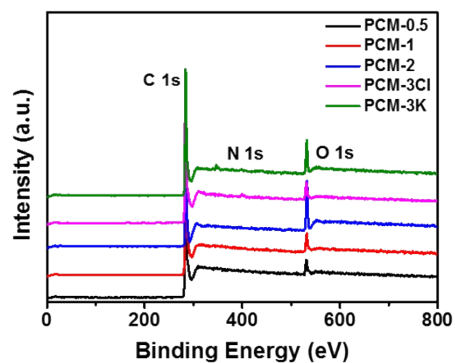

Figure S10. XPS spectra of the as-prepared PCM-0.5, PCM-1, PCM-2, PCM-3Cl and PCM-3K.

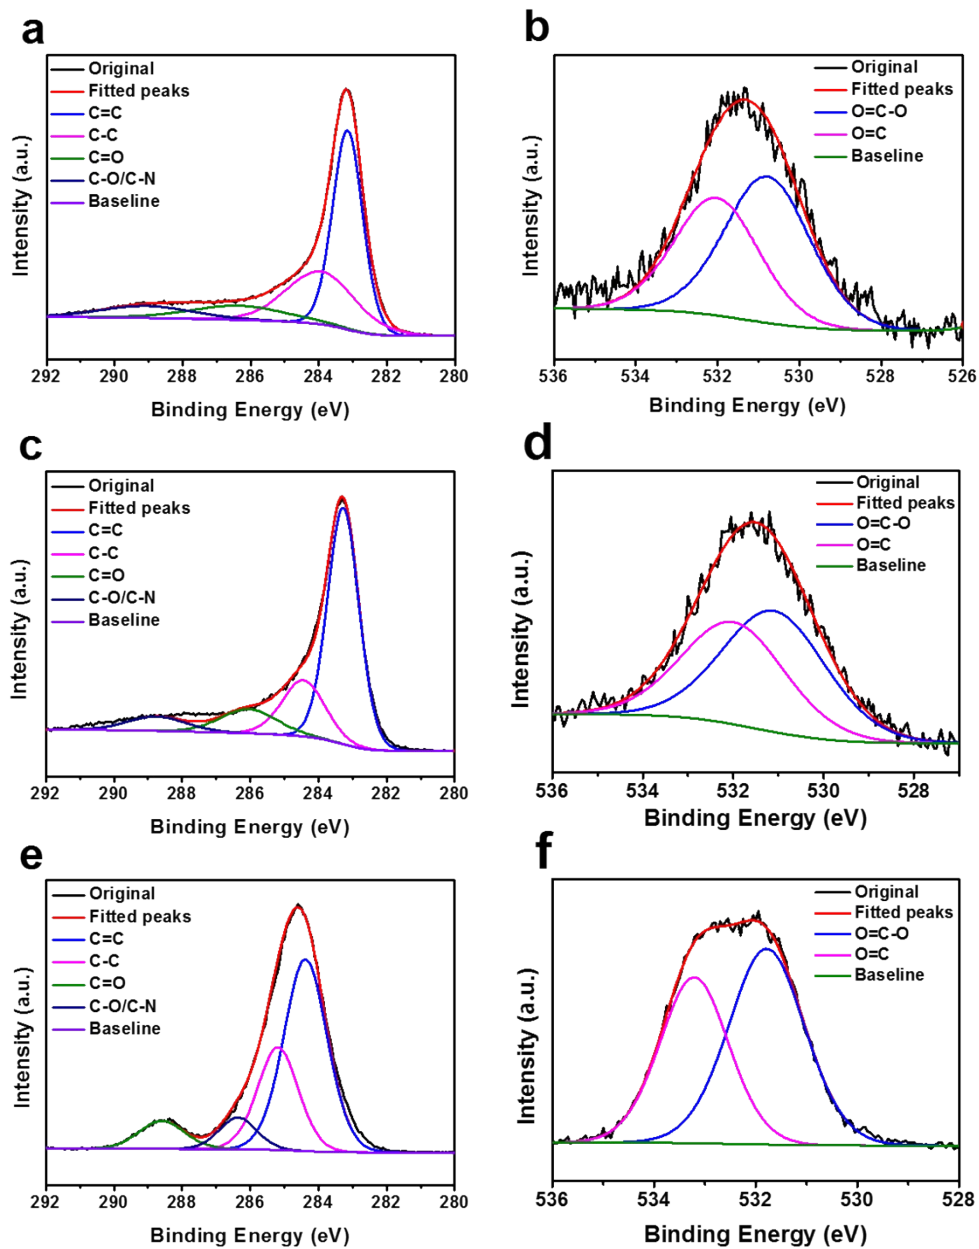



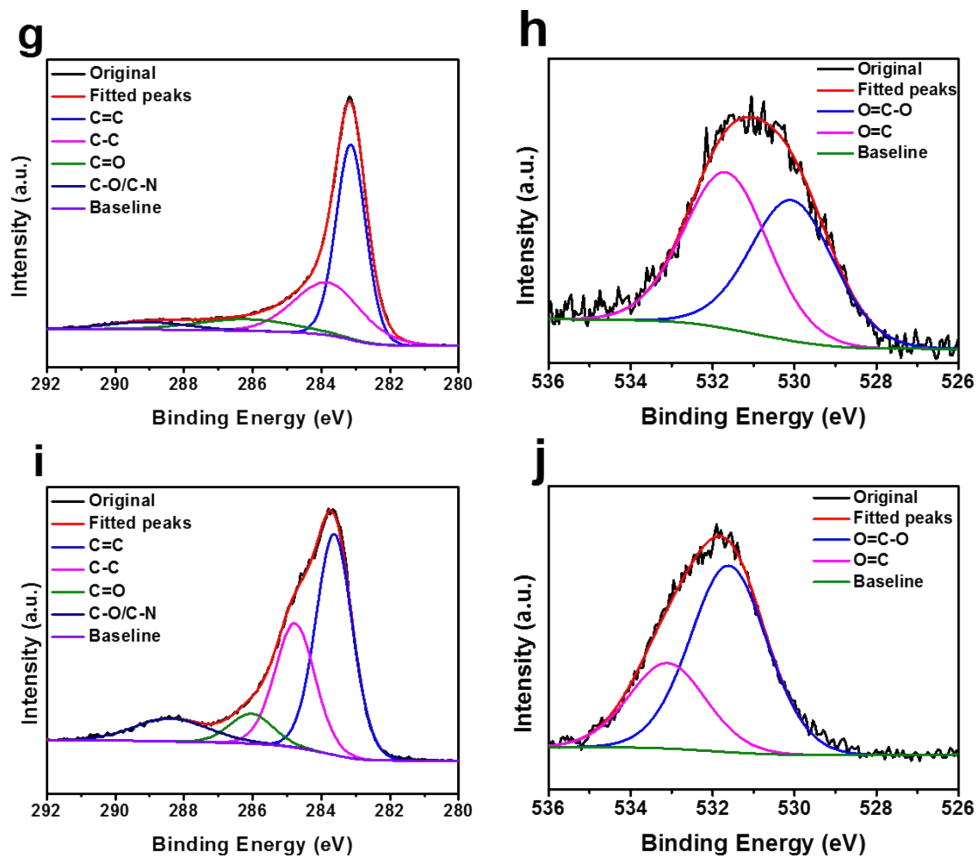

Figure S11. High-resolution C 1s and O 1s XPS spectra of (a, b) PCM-0.5, (c, d) PCM-1, (e, f) PCM-2, (g, h) PCM-3Cl and (i, j) PCM-3K.

**Table S1.** Summary of textural characteristics of as-prepared samples (KOH/KCl).

| Sample  | <sup>a</sup> S <sub>BET</sub><br>(m <sup>2</sup> g <sup>-1</sup> ) | <sup>b</sup> S <sub>mic</sub><br>(m <sup>2</sup> g <sup>-1</sup> ) | <sup>c</sup> V <sub>t</sub><br>(cm <sup>3</sup> g <sup>-1</sup> ) | <sup>d</sup> V <sub>mic</sub><br>(cm <sup>3</sup> g <sup>-1</sup> ) | <sup>e</sup> Biomass yields<br>(%) |
|---------|--------------------------------------------------------------------|--------------------------------------------------------------------|-------------------------------------------------------------------|---------------------------------------------------------------------|------------------------------------|
| PCM-3Cl | 927                                                                | 861                                                                | 0.38                                                              | 0.33                                                                | 17.5                               |
| PCM-0.5 | 2314                                                               | 2166                                                               | 0.94                                                              | 0.84                                                                | 15.6                               |
| PCM-1   | 2703                                                               | 2546                                                               | 1.15                                                              | 1.03                                                                | 14.6                               |
| PCM-2   | 3470                                                               | 2786                                                               | 1.69                                                              | 1.16                                                                | 12.5                               |
| PCM-3K  | 3389                                                               | 2481                                                               | 1.67                                                              | 1.03                                                                | 9.8                                |

**Table S2.** Summary of textural characteristics of as-prepared samples (KOH/NaCl).

| Sample             | <sup>a</sup> S <sub>BET</sub><br>(m <sup>2</sup> g <sup>-1</sup> ) | <sup>b</sup> S <sub>mic</sub><br>(m <sup>2</sup> g <sup>-1</sup> ) | <sup>c</sup> V <sub>t</sub><br>(cm <sup>3</sup> g <sup>-1</sup> ) | <sup>d</sup> V <sub>mic</sub><br>(cm <sup>3</sup> g <sup>-1</sup> ) |
|--------------------|--------------------------------------------------------------------|--------------------------------------------------------------------|-------------------------------------------------------------------|---------------------------------------------------------------------|
| PCM-0.5 (KOH/NaCl) | 1759                                                               | 1639                                                               | 0.73                                                              | 0.63                                                                |
| PCM-1 (KOH/NaCl)   | 2219                                                               | 2069                                                               | 0.95                                                              | 0.81                                                                |
| PCM-2 (KOH/NaCl)   | 2697                                                               | 2477                                                               | 1.19                                                              | 1.0                                                                 |

**Table S3.** Summary of textural characteristics of as-prepared samples (KOH/LiCl).

| Sample             | <sup>a</sup> S <sub>BET</sub><br>(m <sup>2</sup> g <sup>-1</sup> ) | <sup>b</sup> S <sub>mic</sub><br>(m <sup>2</sup> g <sup>-1</sup> ) | <sup>c</sup> V <sub>t</sub><br>(cm <sup>3</sup> g <sup>-1</sup> ) | <sup>d</sup> V <sub>mic</sub><br>(cm <sup>3</sup> g <sup>-1</sup> ) |
|--------------------|--------------------------------------------------------------------|--------------------------------------------------------------------|-------------------------------------------------------------------|---------------------------------------------------------------------|
| PCM-0.5 (KOH/LiCl) | 1325                                                               | 1228                                                               | 0.55                                                              | 0.47                                                                |
| PCM-1 (KOH/LiCl)   | 1767                                                               | 1641                                                               | 0.75                                                              | 0.64                                                                |
| PCM-2 (KOH/LiCl)   | 2169                                                               | 1741                                                               | 0.94                                                              | 0.69                                                                |

(a) Specific surface area.

(b) Micropore surface area.

(c) Total pore volume.

(d) Micropore volume.

(e) The yield of the porous carbon based on raw materials.

**Table S4.** The specific surface areas and preparation conditions of porous carbon derived from different precursors reported in the literatures.

| Carbon precursors              | S <sub>BET</sub><br>(m <sup>2</sup> g <sup>-1</sup> ) | S <sub>micro</sub><br>(m <sup>2</sup> g <sup>-1</sup> ) | T (°C)     | Activation agent                   | Ref.             |
|--------------------------------|-------------------------------------------------------|---------------------------------------------------------|------------|------------------------------------|------------------|
| Soybean milk powder            | 1208                                                  | 987                                                     | 700        | KOH/CaCO <sub>3</sub>              | [1]              |
| Mung bean husks                | 1278                                                  | 1057                                                    | 700        | KOH                                | [2]              |
| Tannic acid                    | 1570                                                  | 1333                                                    | 800        | NaCl/ZnCl <sub>2</sub>             | [3]              |
| Ripe plane tree fluff          | 1416                                                  | 995                                                     | 800        | KOH/FeNO <sub>3</sub>              | [4]              |
| Petroleum asphalt              | 2227                                                  | 1741                                                    | 900        | KOH/NaCl/KCl                       | [5]              |
| Rice straw                     | 2646                                                  | 1416                                                    | 800        | KOH                                | [6]              |
| Wild jujube pit powder         | 2438                                                  | 2170                                                    | 800        | KOH                                | [7]              |
| Eulaliopsis binata             | 2273                                                  | 1045                                                    | 850        | KOH                                | [8]              |
| Puffed rice                    | 3326                                                  | 2193                                                    | 850        | KOH                                | [9]              |
| Miscellaneous wood fibers      | 1807                                                  | 1743.5                                                  | 800        | KOH                                | [10]             |
| Wax gourd                      | 2544                                                  | 1747                                                    | 800        | KOH                                | [11]             |
| Camellia oleifera              | 1726                                                  | 858                                                     | 800        | KOH                                | [12]             |
| Rhus typhina                   | 2676                                                  | 2354                                                    | 800        | KOH                                | [13]             |
| Stachyurus Chinensis Franch    | 1994                                                  | 647.6                                                   | 800        | KOH                                | [14]             |
| Corncob sponge                 | 1909                                                  | 1209                                                    | 850        | KOH                                | [15]             |
| Fallen leaves                  | 1409                                                  | 791                                                     | 700        | KOH/K <sub>2</sub> CO <sub>3</sub> | [16]             |
| D- (+)-glucose                 | 1500                                                  | 1440                                                    | 700        | KOH/ZnCl <sub>2</sub>              | [17]             |
| <b>Moringa oleifera branch</b> | <b>3470</b>                                           | <b>2786</b>                                             | <b>800</b> | <b>KOH/KCl</b>                     | <b>This work</b> |

**Table S5.** The detailed element content of C, N, and O.

| Sample  | C <sub>total</sub> (%) | N <sub>total</sub> (%) | O <sub>total</sub> (%) |
|---------|------------------------|------------------------|------------------------|
| PCM-0.5 | 94.1                   | 0.85                   | 5.05                   |
| PCM-1   | 92.94                  | 1.12                   | 5.94                   |
| PCM-2   | 84.18                  | 0.85                   | 14.97                  |
| PCM-3Cl | 92.43                  | 2.03                   | 5.54                   |
| PCM-3K  | 88.67                  | 1.37                   | 9.97                   |

**Table S6.** Electrochemical performance of Moringa oleifera branch-derived porous carbon in three-electrode system (6 mol L<sup>-1</sup> KOH and current density of 0.5 A g<sup>-1</sup>).

| Sample  | Active material (mg) | Area (cm <sup>2</sup> ) | Gravimetric capacitance (F g <sup>-1</sup> ) | Areal capacitance (mF cm <sup>-2</sup> ) |
|---------|----------------------|-------------------------|----------------------------------------------|------------------------------------------|
| PCM-2   | 3.43                 | 1                       | 421                                          | 1444                                     |
| PCM-3K  | 3.48                 | 1                       | 340                                          | 1183                                     |
| PCM-3Cl | 3.42                 | 1                       | 189                                          | 645                                      |

**Table S7.** Electrochemical performance of Moringa oleifera branch-derived porous carbon in two-electrode system (6 mol L<sup>-1</sup> KOH and current density of 0.1 A g<sup>-1</sup>).

| Sample | Active material (mg) | Area (cm <sup>2</sup> ) | Gravimetric capacitance (F g <sup>-1</sup> ) | Areal capacitance (mF cm <sup>-2</sup> ) |
|--------|----------------------|-------------------------|----------------------------------------------|------------------------------------------|
| PCM-2  | 3.45//3.47           | 0.36 $\pi$              | 343.8                                        | 1052                                     |
| PCM-3K | 3.04//3.11           | 0.36 $\pi$              | 297.8                                        | 808                                      |

**Table S8.** Electrochemical performance of Moringa oleifera branch-derived porous carbon in two-electrode system (1 mol L<sup>-1</sup> Na<sub>2</sub>SO<sub>4</sub> and current density of 0.5 A g<sup>-1</sup>).

| Sample | Active material (mg) | Area (cm <sup>2</sup> ) | Gravimetric capacitance (F g <sup>-1</sup> ) | Areal capacitance (mF cm <sup>-2</sup> ) |
|--------|----------------------|-------------------------|----------------------------------------------|------------------------------------------|
| PCM-2  | 3.24//3.29           | 0.36 $\pi$              | 293.7                                        | 848                                      |
| PCM-3K | 3.45//3.58           | 0.36 $\pi$              | 195.5                                        | 607.9                                    |

**Table S9.** The comparison of electrochemical performance between *Moringa oleifera* branch and carbon materials electrodes reported in 6 M KOH electrolyte system.

| Carbon precursors            | Capacitance (F g <sup>-1</sup> ) |            | Current density (A g <sup>-1</sup> ) | Ref. |
|------------------------------|----------------------------------|------------|--------------------------------------|------|
|                              | Ref                              | This work  |                                      |      |
| Reed membranes               | 353.6                            | <b>421</b> | 0.5                                  | [18] |
| Silicone resin               | 322                              | <b>421</b> | 0.5                                  | [19] |
| Waste bones                  | 302                              | <b>421</b> | 0.5                                  | [20] |
| Sucrose                      | 302                              | <b>380</b> | 1                                    | [21] |
| Nanoporous graphene          | 204                              | <b>316</b> | 10                                   | [22] |
| D (+)-glucosamine            | 388                              | <b>421</b> | 0.5                                  | [23] |
| Rose                         | 208                              | <b>421</b> | 0.5                                  | [24] |
| Bagasse                      | 320                              | <b>421</b> | 0.5                                  | [25] |
| Cotton stalk                 | 282                              | <b>421</b> | 0.5                                  | [26] |
| Polyacrylonitrile            | 331                              | <b>421</b> | 0.5                                  | [27] |
| Sewage sludge                | 379                              | <b>421</b> | 0.5                                  | [28] |
| Cigarette butt               | 330.1                            | <b>421</b> | 0.5                                  | [29] |
| Tobacco rods                 | 286.6                            | <b>421</b> | 0.5                                  | [30] |
| Black locust seed dregs      | 333                              | <b>380</b> | 1                                    | [31] |
| Celery                       | 245                              | <b>421</b> | 0.5                                  | [32] |
| Perilla frutescens leaves    | 270                              | <b>421</b> | 0.5                                  | [33] |
| Willow catkins               | 231                              | <b>316</b> | 10                                   | [34] |
| <i>Moringa oleifera</i> stem | 283                              | <b>421</b> | 0.5                                  | [35] |

**Table S10.** The comparison of electrochemical performance for representative carbons in 1 M Na<sub>2</sub>SO<sub>4</sub> electrolyte system.

| Carbon precursors                      | Capacitance<br>(F g <sup>-1</sup> ) | Current density<br>(A g <sup>-1</sup> ) | Ref.             |
|----------------------------------------|-------------------------------------|-----------------------------------------|------------------|
| N, S-Doped porous carbon               | 204                                 | 0.5                                     | [36]             |
| 1D carbon nanobelts //MnO <sub>2</sub> | 265                                 | 0.2                                     | [37]             |
| 3D Porous carbon nanosheet             | 230                                 | 0.5                                     | [38]             |
| Polyacrylonitrile based porous carbon  | 218                                 | 0.5                                     | [39]             |
| Graphene-like porous carbon            | 255                                 | 0.5                                     | [40]             |
| Hierarchical porous carbon             | 211                                 | 0.5                                     | [41]             |
| Three-dimensional porous carbon        | 179                                 | 0.5                                     | [42]             |
| Nitrogen-doped porous carbon           | 134                                 | 1                                       | [43]             |
| Microporous active carbon              | 138                                 | 1                                       | [44]             |
| Honeycomb-like porous carbon           | 212                                 | 0.5                                     | [45]             |
| Hierarchical porous carbon             | 186                                 | 0.5                                     | [46]             |
| Hierarchical porous carbon             | 191                                 | 0.5                                     | [47]             |
| Carbon nanosheets                      | 272                                 | 1                                       | [35]             |
| N, O-enriched porous carbons           | 157                                 | 0.2                                     | [48]             |
| Egg-Box-Like porous carbon             | 181                                 | 0.2                                     | [49]             |
| N/O co-doped carbon                    | 328                                 | 0.2                                     | [50]             |
| Porous carbon                          | 206                                 | 0.5                                     | [51]             |
| <b>PCM-2</b>                           | <b>293.7</b>                        | <b>0.5</b>                              | <b>This work</b> |

## References:

1. M. Chen, D. Yu, X. Zheng and X. Dong, *Journal of Energy Storage*, 2019, **21**, 105-112.
2. M. Song, Y. Zhou, X. Ren, J. Wan, Y. Du, G. Wu and F. Ma, *J Colloid Interface Sci*, 2019, **535**, 276-286.
3. G. A. Tiruye, D. Muñoz-Torrero, T. Berthold, J. Palma, M. Antonietti, N. Fechler and R. Marcilla, *Journal of Materials Chemistry A*, 2017, **5**, 16263-16272.
4. Y. Yao, Y. Zhang, L. Li, S. Wang, S. Dou and X. Liu, *ACS Appl Mater Interfaces*, 2017, **9**, 34944-34953.
5. L. Pan, X. Li, Y. Wang, J. Liu, W. Tian, H. Ning and M. Wu, *Applied Surface Science*, 2018, **444**, 739-746.
6. L. Zhu, F. Shen, R. L. Smith, L. Yan, L. Li and X. Qi, *Chemical Engineering Journal*, 2017, **316**, 770-777.
7. K. Sun, S. Yu, Z. Hu, Z. Li, G. Lei, Q. Xiao and Y. Ding, *Electrochimica Acta*, 2017, **231**, 417-428.
8. B. Liu, H. Chen, Y. Gao and H. Li, *Electrochimica Acta*, 2016, **189**, 93-100.
9. J. Hou, K. Jiang, M. Tahir, X. Wu, F. Idrees, M. Shen and C. Cao, *Journal of Power Sources*, 2017, **371**, 148-155.
10. F. Liu, Y. Gao, C. Zhang, H. Huang, C. Yan, X. Chu, Z. Xu, Z. Wang, H. Zhang, X. Xiao and W. Yang, *J Colloid Interface Sci*, 2019, **548**, 322-332.
11. X. Bo, K. Xiang, Y. Zhang, Y. Shen, S. Chen, Y. Wang, M. Xie and X. Guo, *Journal of Energy Chemistry*, 2019, **39**, 1-7.
12. D. Yu, Y. Ma, M. Chen and X. Dong, *J Colloid Interface Sci*, 2019, **537**, 569-578.
13. X. Wei, J.-S. Wei, Y. Li and H. Zou, *Journal of Power Sources*, 2019, **414**, 13-23.
14. Y. Yao, Z. Xiao, P. Liu, S. Zhang, Y. Niu, H. Wu, S. Liu, W. Tu, Q. Luo, M. A. Z. G. Sial, S. Zeng, Q. Zhang, J. Zou, X. Zeng and W. Zhang, *Carbon*, 2019, **155**, 674-685.
15. L. Peng, Y. Liang, H. Dong, H. Hu, X. Zhao, Y. Cai, Y. Xiao, Y. Liu and M. Zheng, *Journal of Power Sources*, 2018, **377**, 151-160.
16. Y.-T. Li, Y.-T. Pi, L.-M. Lu, S.-H. Xu and T.-Z. Ren, *Journal of Power Sources*, 2015, **299**, 519-528.
17. M. Härmas, T. Thomberg, H. Kurig, T. Romann, A. Jänes and E. Lust, *Journal of Power Sources*, 2016, **326**, 624-634.
18. C.-L. Ban, Z. Xu, D. Wang, Z. Liu and H. Zhang, *ACS Sustainable Chemistry & Engineering*, 2019, **7**, 10742-10750.
19. J. Yang, J. Hu, M. Zhu, Y. Zhao, H. Chen and F. Pan, *Journal of Power Sources*, 2017, **365**, 362-371.
20. L. Niu, C. Shen, L. Yan, J. Zhang, Y. Lin, Y. Gong, C. Li, C. Q. Sun and S. Xu, *J Colloid Interface Sci*, 2019, **547**, 92-101.
21. J. Zhou, M. Wang and X. Li, *Applied Surface Science*, 2018, **462**, 444-452.
22. E. Senthilkumar, V. Sivasankar, B. R. Kohakade, K. Thileepkumar, M. Ramya, G. Sivagaami Sundari, S. Raghu and R. A. Kalaivani, *Applied Surface Science*, 2018, **460**, 17-24.
23. Y. Qing, Y. Jiang, H. Lin, L. Wang, A. Liu, Y. Cao, R. Sheng, Y. Guo, C. Fan, S. Zhang, D. Jia and Z. Fan, *Journal of Materials Chemistry A*, 2019, **7**, 6021-6027.
24. C. Zhao, Y. Huang, C. Zhao, X. Shao and Z. Zhu, *Electrochimica Acta*, 2018, **291**, 287-296.
25. H. Feng, H. Hu, H. Dong, Y. Xiao, Y. Cai, B. Lei, Y. Liu and M. Zheng, *Journal of Power Sources*, 2016, **302**, 164-173.
26. Z. Li, S. Gao, H. Mi, C. Lei, C. Ji, Z. Xie, C. Yu and J. Qiu, *Carbon*, 2019, **149**, 273-280.
27. Y. Liu, N. Liu, L. Yu, X. Jiang and X. Yan, *Chemical Engineering Journal*, 2019, **362**, 600-608.
28. H. Feng, M. Zheng, H. Dong, Y. Xiao, H. Hu, Z. Sun, C. Long, Y. Cai, X. Zhao, H. Zhang, B. Lei and Y. Liu, *Journal of Materials Chemistry A*, 2015, **3**, 15225-15234.
29. Q. Meng, W. Chen, L. Wu, J. Lei, X. Liu, W. Zhu and T. Duan, *Energy*, 2019, **189**, 116241.
30. Y.-Q. Zhao, M. Lu, P.-Y. Tao, Y.-J. Zhang, X.-T. Gong, Z. Yang, G.-Q. Zhang and H.-L. Li, *Journal of Power Sources*, 2016, **307**, 391-400.

31. L. Hou, Z. Hu, X. Wang, L. Qiang, Y. Zhou, L. Lv and S. Li, *J Colloid Interface Sci*, 2019, **540**, 88-96.
32. J. He, D. Zhang, M. Han, X. Liu, Y. Wang, Y. Li, X. Zhang, K. Wang, H. Feng and Y. Wang, *Journal of Energy Storage*, 2019, **21**, 94-104.
33. B. Liu, Y. Liu, H. Chen, M. Yang and H. Li, *Journal of Power Sources*, 2017, **341**, 309-317.
34. K. Wang, N. Zhao, S. Lei, R. Yan, X. Tian, J. Wang, Y. Song, D. Xu, Q. Guo and L. Liu, *Electrochimica Acta*, 2015, **166**, 1-11.
35. Y. Cai, Y. Luo, H. Dong, X. Zhao, Y. Xiao, Y. Liang, H. Hu, Y. Liu and M. Zheng, *Journal of Power Sources*, 2017, **353**, 260-269.
36. D. Wu, J. Cheng, T. Wang, P. Liu, L. Yang and D. Jia, *ACS Sustainable Chemistry & Engineering*, 2019, **7**, 12138-12147.
37. T. Ouyang, K. Cheng, F. Yang, L. Zhou, K. Zhu, K. Ye, G. Wang and D. Cao, *Journal of Materials Chemistry A*, 2017, **5**, 14551-14561.
38. Y. Li, S. Liu, Y. Liang, Y. Xiao, H. Dong, M. Zheng, H. Hu and Y. Liu, *ACS Sustainable Chemistry & Engineering*, 2019, **7**, 13827-13835.
39. Y. Li, Y. Liang, H. Hu, H. Dong, M. Zheng, Y. Xiao and Y. Liu, *Carbon*, 2019, **152**, 120-127.
40. G. Yuan, H. Li, H. Hu, Y. Xie, Y. Xiao, H. Dong, Y. Liang, Y. Liu and M. Zheng, *Electrochimica Acta*, 2019, **326**, 134974.
41. J. Huang, L. Chen, H. Dong, Y. Zeng, H. Hu, M. Zheng, Y. Liu, Y. Xiao and Y. Liang, *Electrochimica Acta*, 2017, **258**, 504-511.
42. W. Zhao, Y. Zhu, L. Zhang, Y. Xie and X. Ye, *Journal of Alloys and Compounds*, 2019, **787**, 1-8.
43. C. Long, J. Zhuang, Y. Xiao, M. Zheng, H. Hu, H. Dong, B. Lei, H. Zhang and Y. Liu, *Journal of Power Sources*, 2016, **310**, 145-153.
44. X. Song, X. Ma, Y. Li, L. Ding and R. Jiang, *Applied Surface Science*, 2019, **487**, 189-197.
45. T. Guan, J. Zhao, G. Zhang, J. Wang, D. Zhang and K. Li, *ACS Sustainable Chemistry & Engineering*, 2018, **7**, 2116-2126.
46. J. Huang, Y. Liang, H. Hu, S. Liu, Y. Cai, H. Dong, M. Zheng, Y. Xiao and Y. Liu, *Journal of Materials Chemistry A*, 2017, **5**, 24775-24781.
47. Y. Li, B. Mou, Y. Liang, H. Dong, M. Zheng, Y. Xiao and Y. Liu, *ACS Sustainable Chemistry & Engineering*, 2019, **7**, 15259-15266.
48. Y. Cheng, B. Li, Y. Huang, Y. Wang, J. Chen, D. Wei, Y. Feng, D. Jia and Y. Zhou, *Applied Surface Science*, 2018, **439**, 712-723.
49. Y. Cai, Y. Luo, Y. Xiao, X. Zhao, Y. Liang, H. Hu, H. Dong, L. Sun, Y. Liu and M. Zheng, *ACS Appl Mater Interfaces*, 2016, **8**, 33060-33071.
50. D. He, J. Niu, M. Dou, J. Ji, Y. Huang and F. Wang, *Electrochimica Acta*, 2017, **238**, 310-318.
51. P. Yu, Y. Liang, H. Dong, H. Hu, S. Liu, L. Peng, M. Zheng, Y. Xiao and Y. Liu, *ACS Sustainable Chemistry & Engineering*, 2018, **6**, 15325-15332.
